# Supplementary material for: β-sitosterol improves the pathological progression of PCOS by targeting ESRα to inhibit autophagy activity
Source: Research Square preprint supplement (doi:10.21203/rs.3.rs-7067456/v1), 2025-07-29
Supplement: Supplementary file 1 [file 9363fbbb0ffb0af4f96d80f3.docx]

**Highlights:**

● β-sitosterol attenuates the pathologic progression of PCOS in rats

● Inhibition of ovarian granulosa cell apoptosis in PCOS by β-sitosterol

● β-sitosterol inhibits autophagic hyperactivation in PCOS ovarian granulosa cells

● Molecular docking and molecular modeling kinetic results of β-sitosterol with ESRα and AKT

● β-sitosterol inhibits autophagy activation and KGN cell apoptosis in PCOS by targeting ESRα
